# Supplementary material
Source: HighWire-hosted journal article supplement (https://bmjopen.bmj.com/content/7/5/e014605)
Supplement: inline-supplementary-material-1 [file inline-supplementary-material-1.pdf]

## Appendix A: Demand management strategies

### Co-payment

Contacting the GPC will cost 75 euros, which will not be reimbursed by the insurance company. The cost for visiting the Emergency Department or calling 112 will be 150 euro, a fee that will also not be reimbursed by the insurance company. \*

*\* This is an hypothetical situation, in the current situation all cost for visiting a GPC or Emergency Department are reimbursed by the insurance company for children younger than 18 years old.*

### Online advice

#### *Urgent cases*

When you check the symptoms of your child online, via an App developed by the Dutch GP Association, you get the advice to contact the GPC.

#### *Nonurgent cases*

##### *Swallow marble:*

When you check the symptoms of your child online, via an App developed by the Dutch GP Association, you get the following advice:

*Give your child something to drink and (if necessary) reassure your child. Check if the marble is coming with your child's stool.*

##### *Earache:*

When you check the symptoms of your child online, via an App developed by the Dutch GP Association, you get the following advice:

*Give your child something to drink and (if necessary) a painkiller. Reassure your child and let your child sleep.*

### Overview medical cost

Contacting the GPC will cost 75 euros, visiting the Emergency Department or calling 112 will cost 150 euro. All costs would be reimbursed by your insurance company.

### Direct GP appointment next morning.

It is possible to plan an appointment with your own GP for the next morning with an online tool.
