# Supplementary material
Source: HighWire-hosted journal article supplement (https://bmjopen.bmj.com/content/7/5/e014605)
Supplement: inline-supplementary-material-2 [file inline-supplementary-material-2.pdf]

## Appendix B: Cases

### Nonurgent cases

#### *Swallow marble*

Your three-year-old child swallowed a marble. Your child does not mention to be in pain, is not nauseous, and does not cough. Your child does not have a background of medical problems, nor use any medicine. It is Saturday afternoon and your own GP is not available.

#### *Earache*

Your child is 4 years old and has had an earache since last night. Your child does not have fever, is conscious and alert, but has a cold (coughs and a runny nose). Your child does not have any other health problems and has a temperature of 36,7°C. It is Wednesday evening, 20.00 h and you cannot reach your own GP anymore.

### Urgent cases

#### *Fever*

Your child is 8 months old and has fever. Last week your child had a cold, fever and was coughing seriously. It seemed that your child got better, but the fever (39,1°C) returned. Your child drinks little and still coughs. It is Tuesday evening 19.00 h, and you cannot reach your own GP anymore.

#### *Diarrhoea*

Your 1,5 year old child has been feeling ill for the past 2 days. Your child indicates he has a stomach-ache, is vomiting and has fluid diarrhoea. You are worried because your child drinks little and has a temperature of 38,6°C. It is unclear if your child still gets wet diapers because of the diarrhoea. You do notice that your child has a dry mouth. Your child does not have a medical history. It is Sunday morning, and your own GP is not available.
